# Supplementary material for: Resolving fine‐scale population structure and fishery exploitation using sequenced microsatellites in a northern fish
Source: PubMed Central journal article supplement (PMC7232759; doi:10.1111/eva.12922), 2020-02-20
Supplement: EVA-13-1055-s002.pdf [file EVA-13-1055-s002.pdf]

Log L Ratio

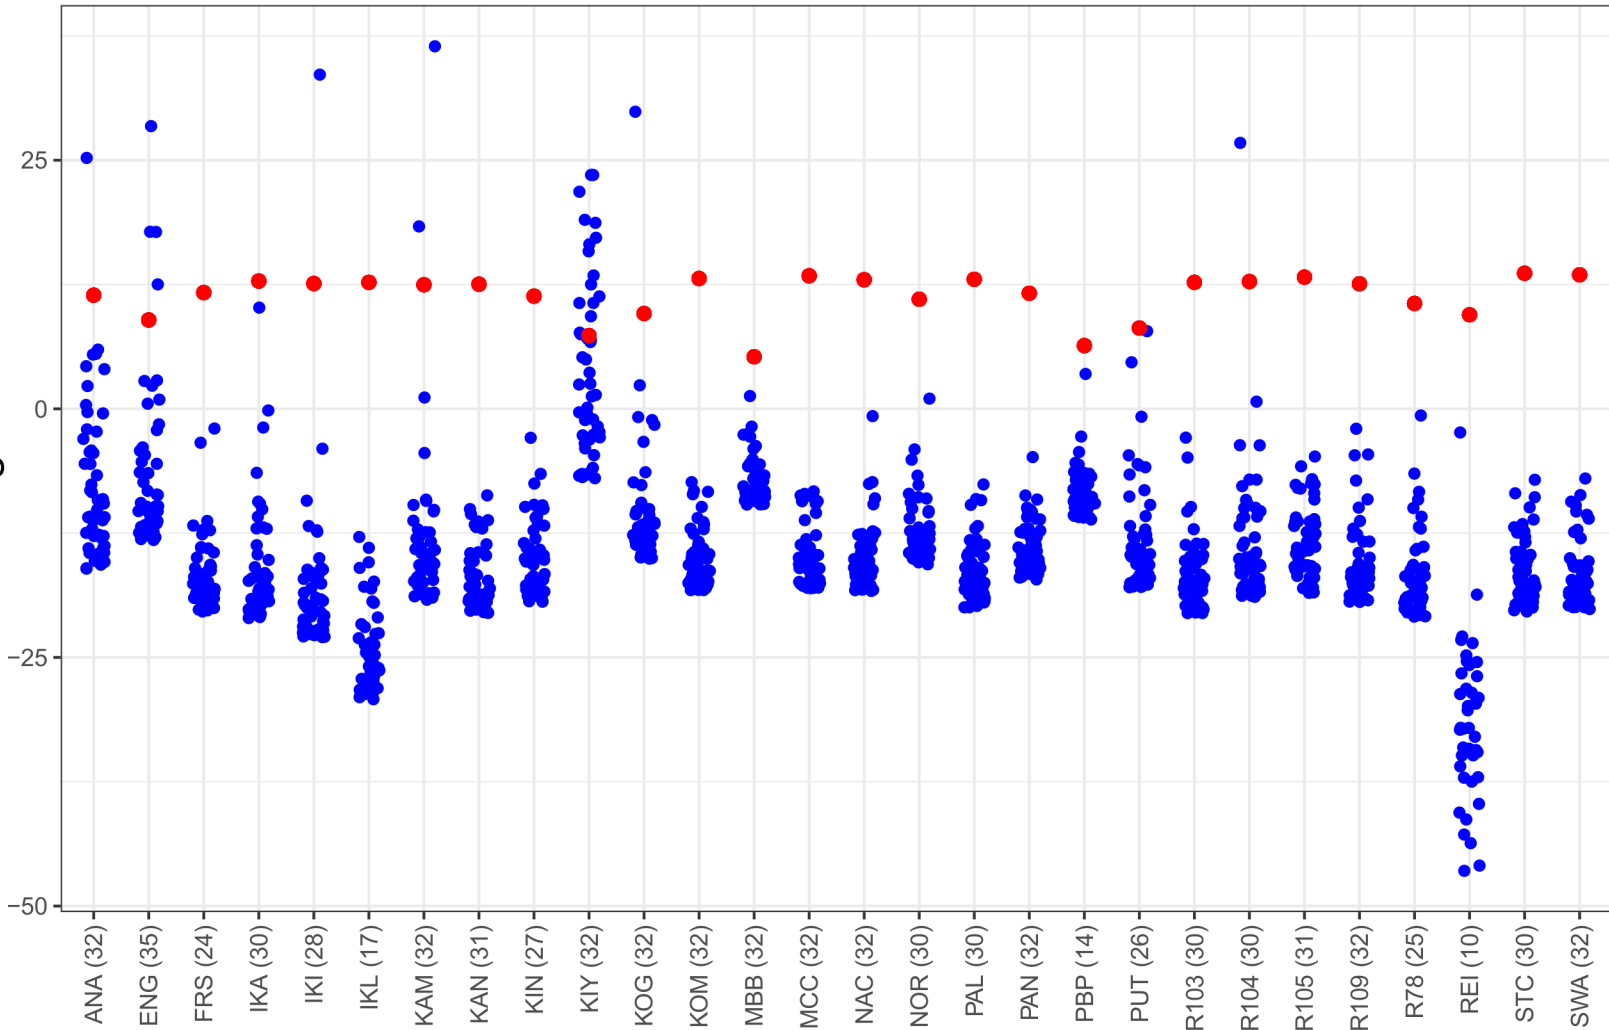

Population
