# Supplementary material for: Resolving fine‐scale population structure and fishery exploitation using sequenced microsatellites in a northern fish
Source: PubMed Central journal article supplement (PMC7232759; doi:10.1111/eva.12922), 2020-02-20
Supplement: EVA-13-1055-s005.pdf [file EVA-13-1055-s005.pdf]

Number of individuals recaptured

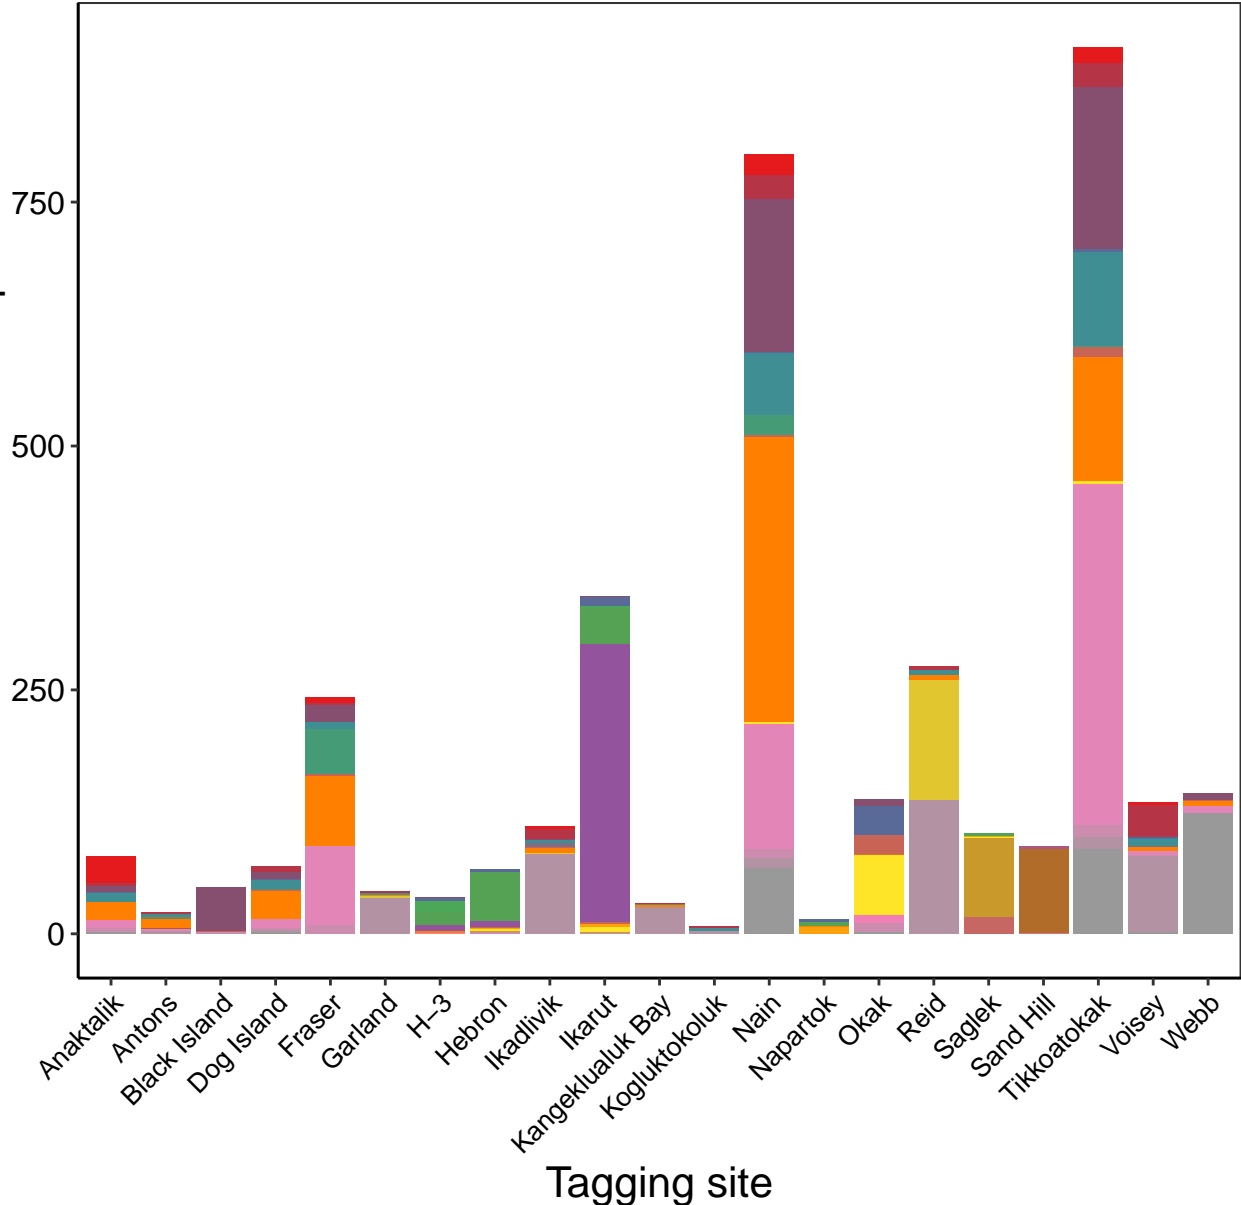

Recapture site

- Anaktalik
- Antons
- Black Island
- Cutthroat
- Davis Inlet
- Dog Island
- Fraser
- H-3
- Hebron
- Hopedale
- Ikadlivik
- Ikarut
- Indian Tickle
- Kiglapaits
- Mugford
- Nain
- Napartok
- Notakwanon River
- Okak
- Pangertok
- Reid
- Saglek
- Sand Hill
- Sango Bay
- Southwest Arm
- Table Bay
- Tasiuyak
- Tikkoatokak
- Unknown
- Voisey
- Webb
